# Supplementary material for: Hybrid Ti6Al4V/Silk Fibroin Composite for Load-Bearing Implants: A Hierarchical Multifunctional Cellular Scaffold
Source: MDPI journal article supplement (doi:10.3390/ma15176156), 2022-09-05
Supplement: s1 [file s1]

**Table S1.** Minimum, maximum values and, Skewness and Kurtosis values of the investigated porosity parameters (area A, equivalent diameter  $D_{eq}$ , circularity C, and aspect ratio AR).

|                  | A [ $\mu\text{m}^2$ ] |            |          |          | $D_{eq}$ [ $\mu\text{m}$ ] |     |          |          | C    |      |          |          | AR   |      |          |          |
|------------------|-----------------------|------------|----------|----------|----------------------------|-----|----------|----------|------|------|----------|----------|------|------|----------|----------|
|                  | Min                   | Max        | Skewness | Kurtosis | Min                        | Max | Skewness | Kurtosis | Min  | Max  | Skewness | Kurtosis | Min  | Max  | Skewness | Kurtosis |
| SF               | 201                   | 2313<br>18 | 4.68     | 29.76    | 16                         | 543 | 2.12     | 5.03     | 0.11 | 0.94 | -0.17    | -1.05    | 1.00 | 7.73 | 2.32     | 6.55     |
| SF_E<br>W        | 201                   | 3020<br>65 | 4.21     | 21.86    | 16                         | 620 | 2.05     | 4.47     | 0.08 | 1.00 | -0.01    | -0.90    | 1.06 | 6.92 | 2.07     | 4.63     |
| SFG              | 201                   | 1396<br>19 | 4.26     | 23.34    | 16                         | 422 | 1.80     | 4.24     | 0.10 | 0.92 | -0.34    | -0.79    | 1.04 | 9.71 | 3.34     | 18.43    |
| SF<br>SFG<br>_EW | 200                   | 5764<br>6  | 2.18     | 4.43     | 16                         | 271 | 1.41     | 0.79     | 0.18 | 0.90 | 0.18     | -1.12    | 1.06 | 8.75 | 2.30     | 6.36     |
